# Supplementary material for: Preparation of UV-Curable Low Surface Energy Polyurethane Acrylate/Fluorinated Siloxane Resin Hybrid Coating with Enhanced Surface and Abrasion Resistance Properties
Source: MDPI journal article supplement (doi:10.3390/ma13061388), 2020-03-19
Supplement: s1 [file s1]

# Preparation of UV-Curable Low Surface Energy Polyurethane Acrylate/Fluorinated Siloxane Resin Hybrid Coating with Enhanced Surface and Abrasion Resistance Properties

Jianping Zhou, Chunfang Zhu, Hongbo Liang \*, Zhengyue Wang, and Hailong Wang

School of Material Science and Engineering, Nanchang Hangkong University, Nanchang 330063, China; zf161162@163.com (J.Z.); Zhuchunfang\_123@163.com (C.Z.); 18270890654@163.com (Z.W.); 15732633597@163.com (H.W.)

\* Correspondence: lhongbo@nchu.edu.cn

Received: 12 November 2019; Accepted: 17 March 2020; Published: date

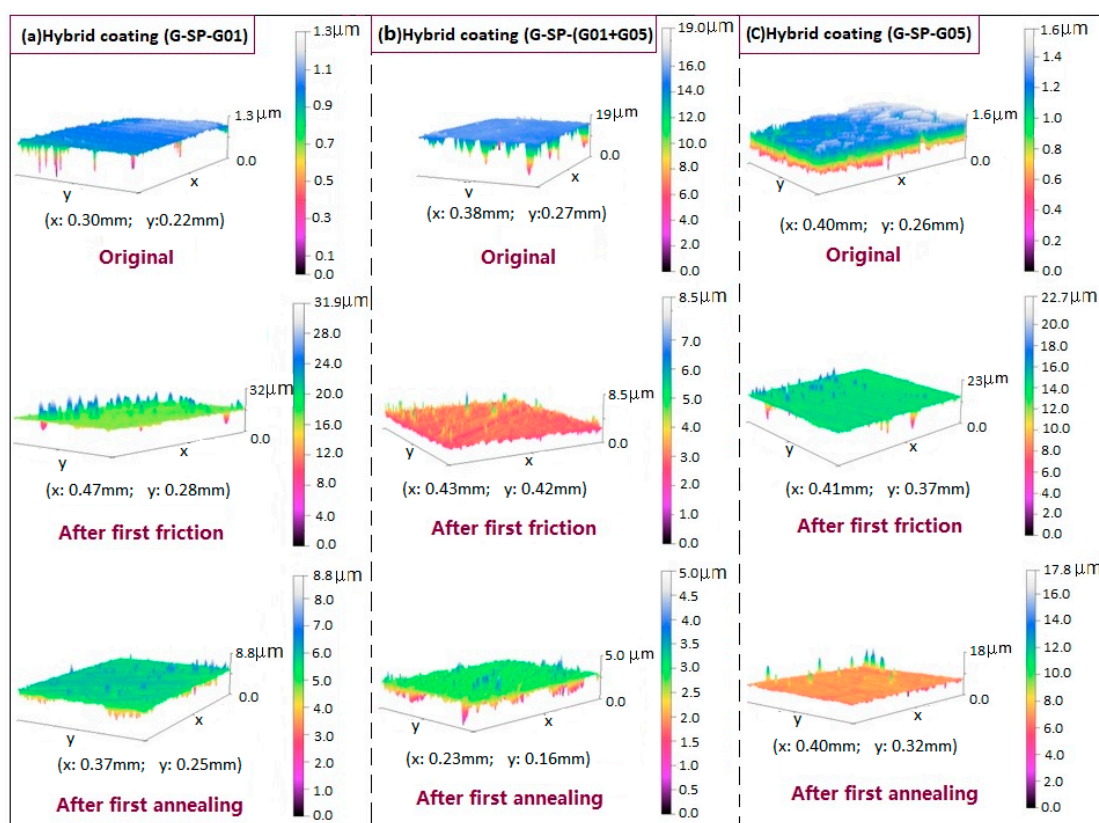

**Figure S1.** Surface morphology imaging showing the pristine coating, following the first friction treatment and following subsequent first annealing treatment for hybrid coating samples: (a) hybrid coating with 2 wt.% G-SP-G01 addition; (b) hybrid coating with 2 wt.% G-SP-(G01+G05) addition; (c) hybrid coating with 2 wt.% G-SP-G05 addition

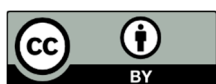

© 2020 by the authors. Submitted for possible open access publication under the terms and conditions of the Creative Commons Attribution (CC BY) license (<http://creativecommons.org/licenses/by/4.0/>).
